# Supplementary material for: Systematic Analysis of the Aberrances and Functional Implications of Ferroptosis in Cancer
Source: PubMed Central journal article supplement — iScience. 2020 Jun 20;23(7):101302. doi: 10.1016/j.isci.2020.101302 (PMC7334617; doi:10.1016/j.isci.2020.101302), 2020-06-20
Supplement: mmc1.pdf [file mmc1.pdf]

iScience, Volume 23

## **Supplemental Information**

### **Systematic Analysis of the Aberrances and Functional Implications of Ferroptosis in Cancer**

**Zekun Liu, Qi Zhao, Zhi-Xiang Zuo, Shu-Qiang Yuan, Kai Yu, Qingfeng Zhang, Xiaolong Zhang, Hui Sheng, Huai-Qiang Ju, Han Cheng, Feng Wang, Rui-Hua Xu, and Ze-Xian Liu**

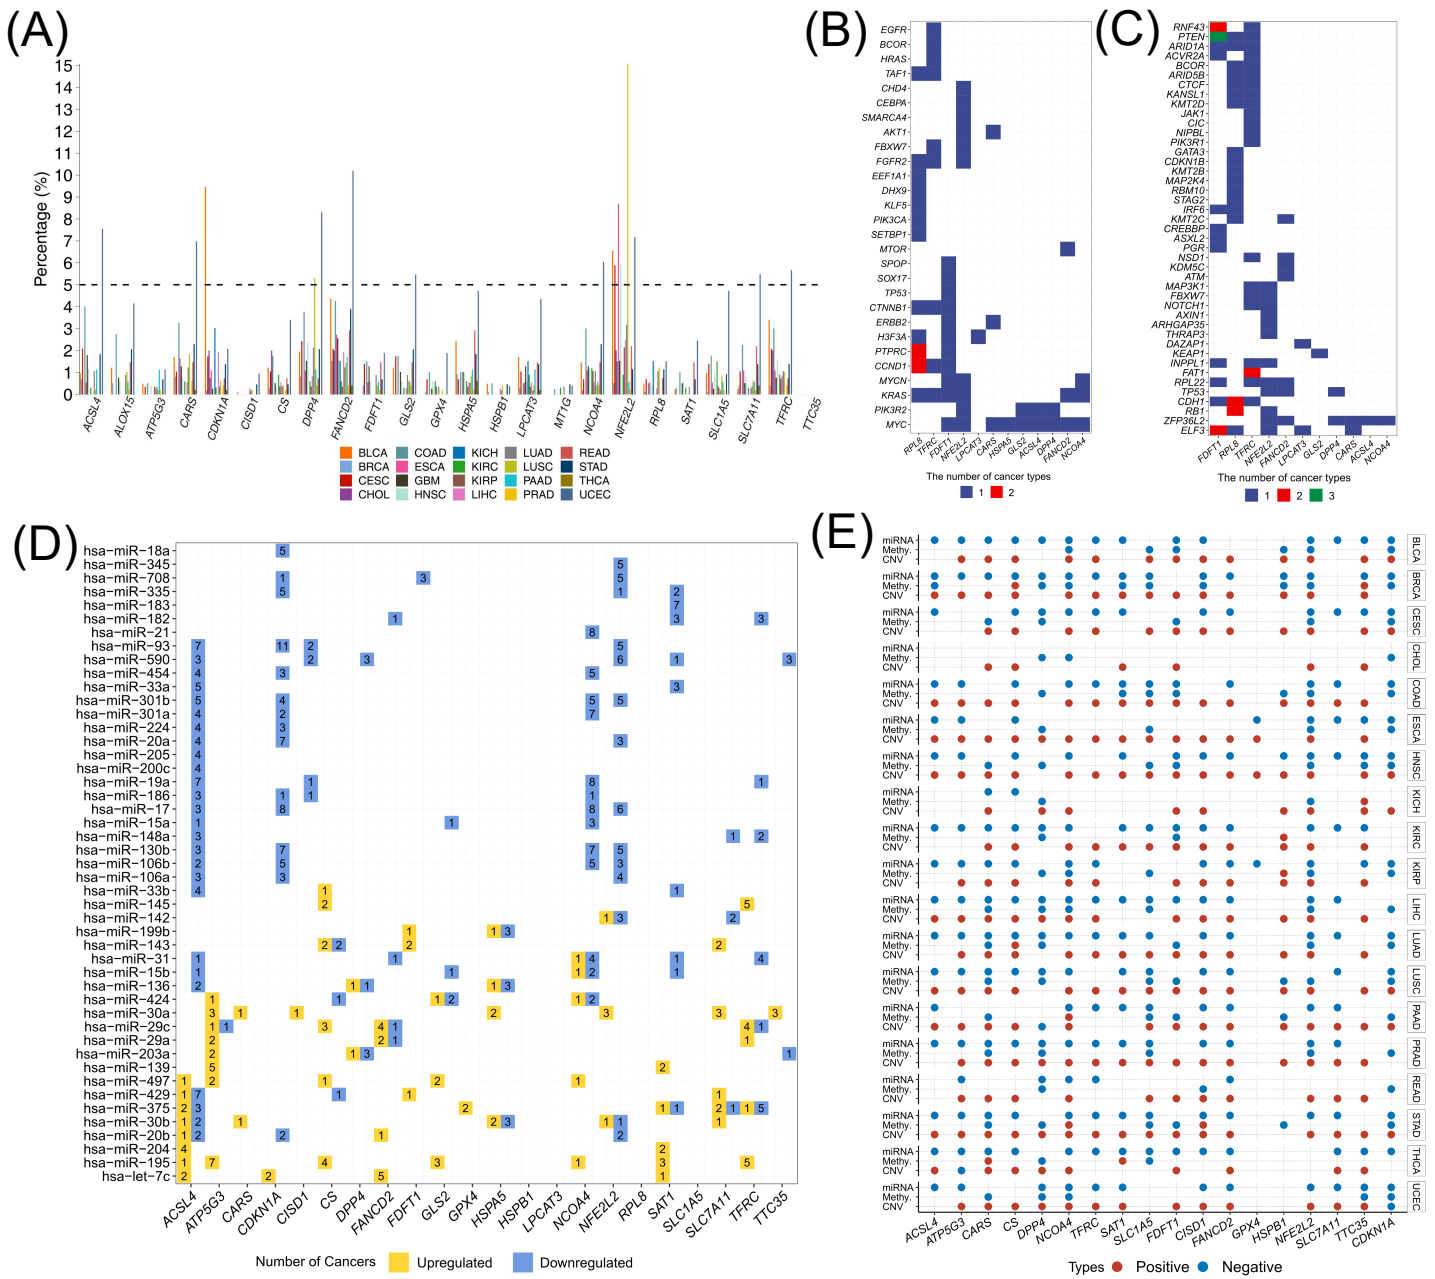

Figure S1. Molecular alterations of FRGs. Related to Figure 1.

The mutation frequencies (A), mutual exclusivity of FRGs and oncogenes (B) /tumor suppressor genes (C) among cancers. (D) The differential expressed FRGs-related miRNAs. The correlation between FRG expression and somatic copy number alternation, DNA methylation and miRNA expressions.

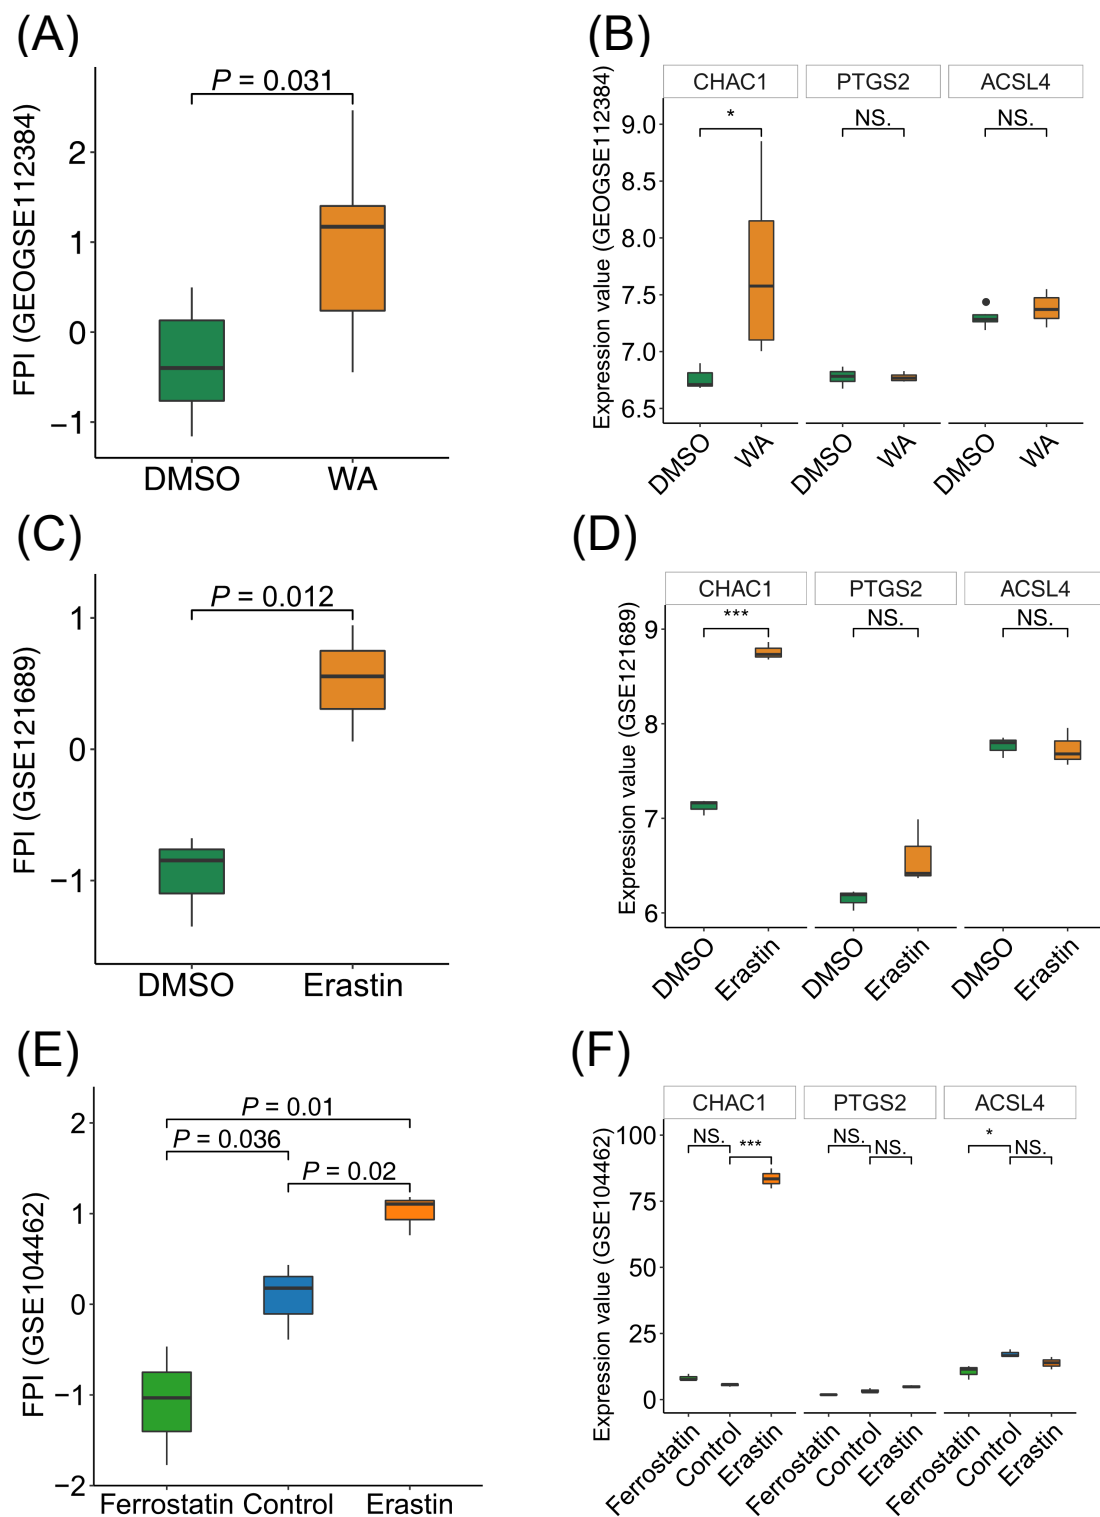

Figure S2. Established the FPI in cell lines and examined the performance of the FPI. Related to Figure 2.

The boxes showed the FPI between withaferin A (WA), erastin or ferrostatin and the control (A, D, G). The boxes showed the comparison of three genes between stimulators and control in neuroblastoma cells (B), clear cell carcinoma cells (E) and liver cancer cells (H). The correlation between the expression of *CHAC1* and the FPI in neuroblastoma cells (C), clear cell carcinoma cells (F) and liver cancer cells (I). The boxes in A-F mean the median values  $\pm$  1 quartile, their whiskers extending from the median to the smallest or biggest value which is  $1.5 \times$  IQR from the boundary of boxes. NS. indicates not significant ( $p$  value  $> 0.05$ ), \*  $p$  value  $< 0.05$ ; \*\*  $p$  value  $< 0.01$ ; \*\*\*  $p$  value  $< 0.001$ .

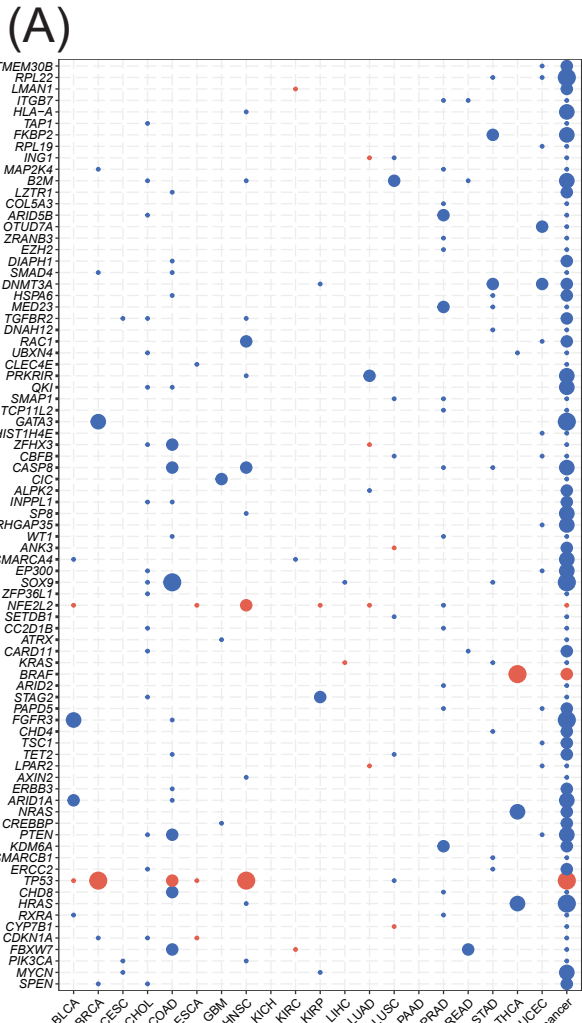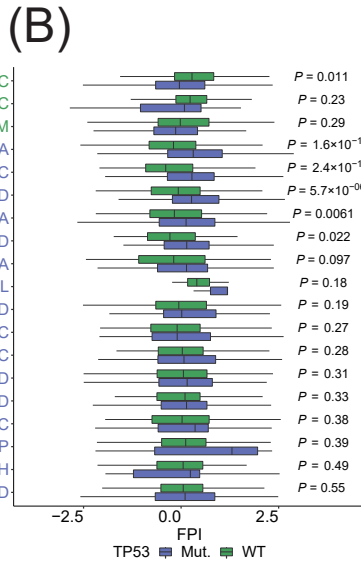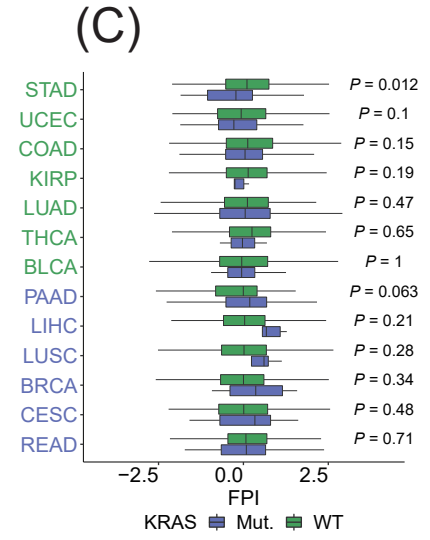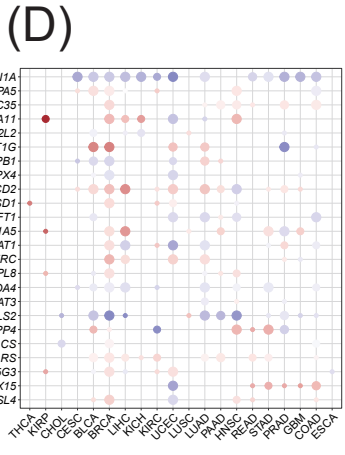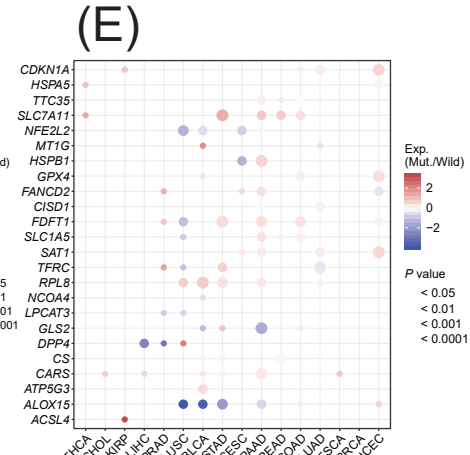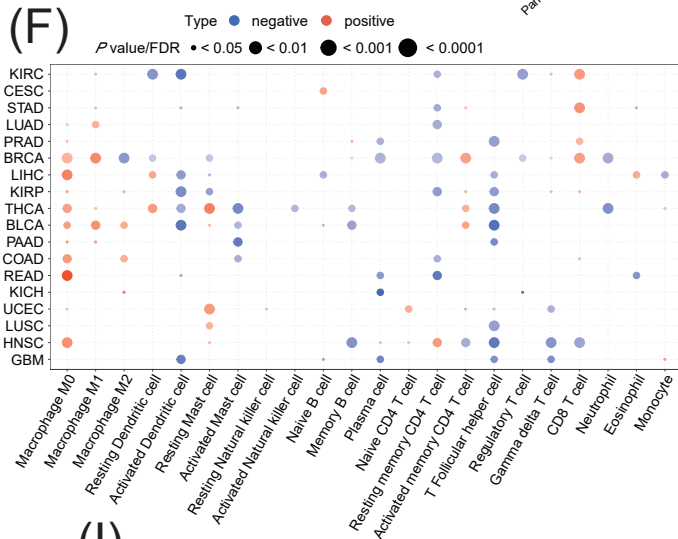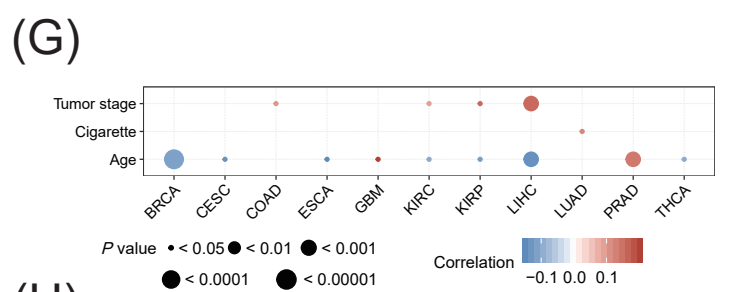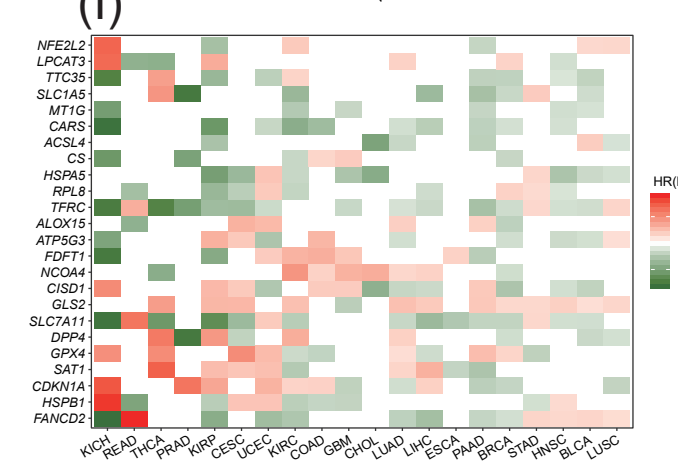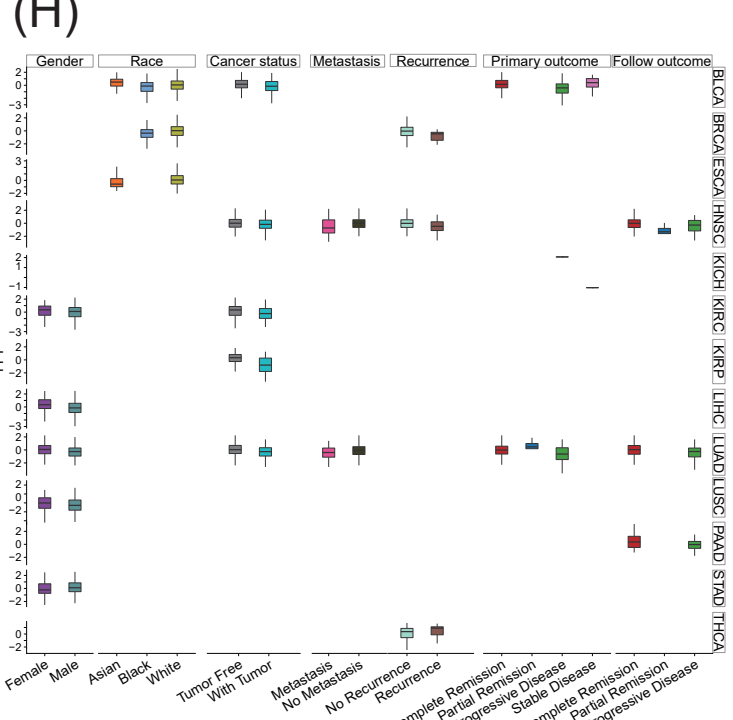

Figure S3. The relationship between other factors and the FPI or expression of FRGs. Related to Figure 2, Figure 3, and Figure 4.

The implication of the mutation status of driver genes on the FPI (A). The FPI between mutant and wild type tumors for *TP53* (B) and *KRAS* (C). The differential expression of FRGs between mutant and wild type tumors for *TP53* (D) and *KRAS* (E). The correlation between ferroptosis and immune cells (F) and clinical characteristics (G-H). The overall prognostic abilities of FRGs (I). The boxes in B, C, and H mean the median values  $\pm$  1 quartile, their whiskers extending from the median to the smallest or biggest value which is  $1.5 \times$  IQR from the boundary of boxes.

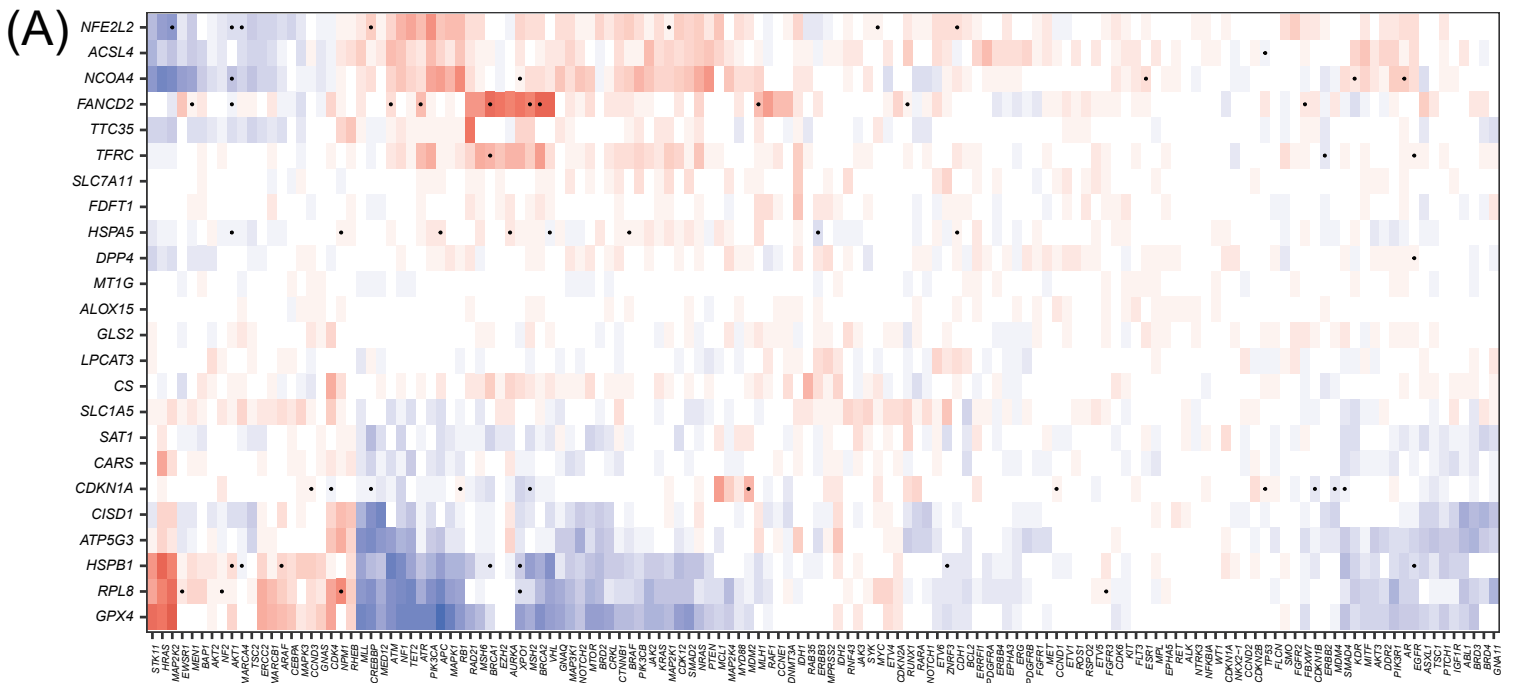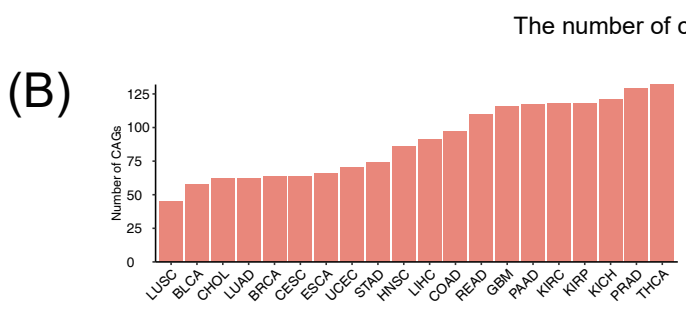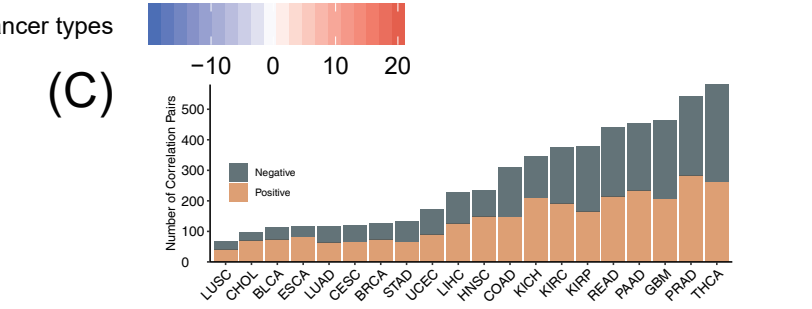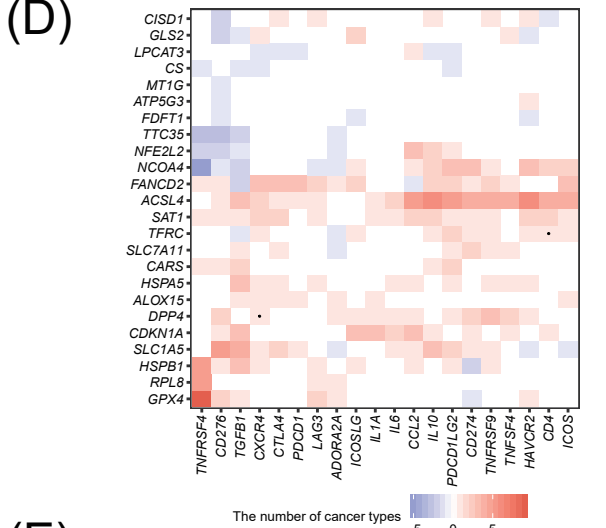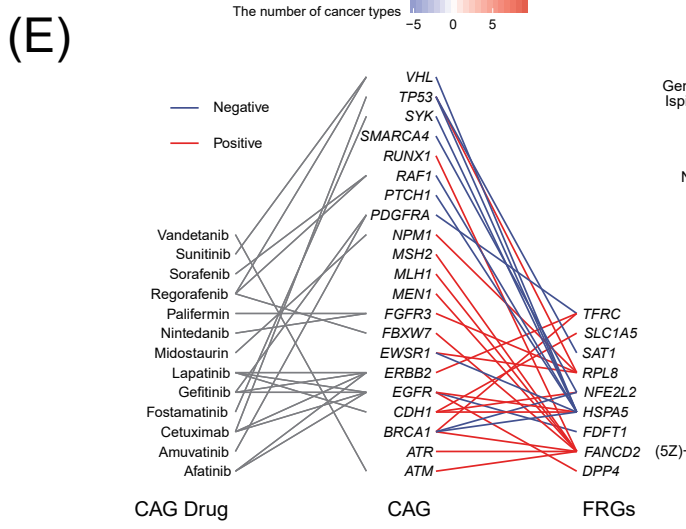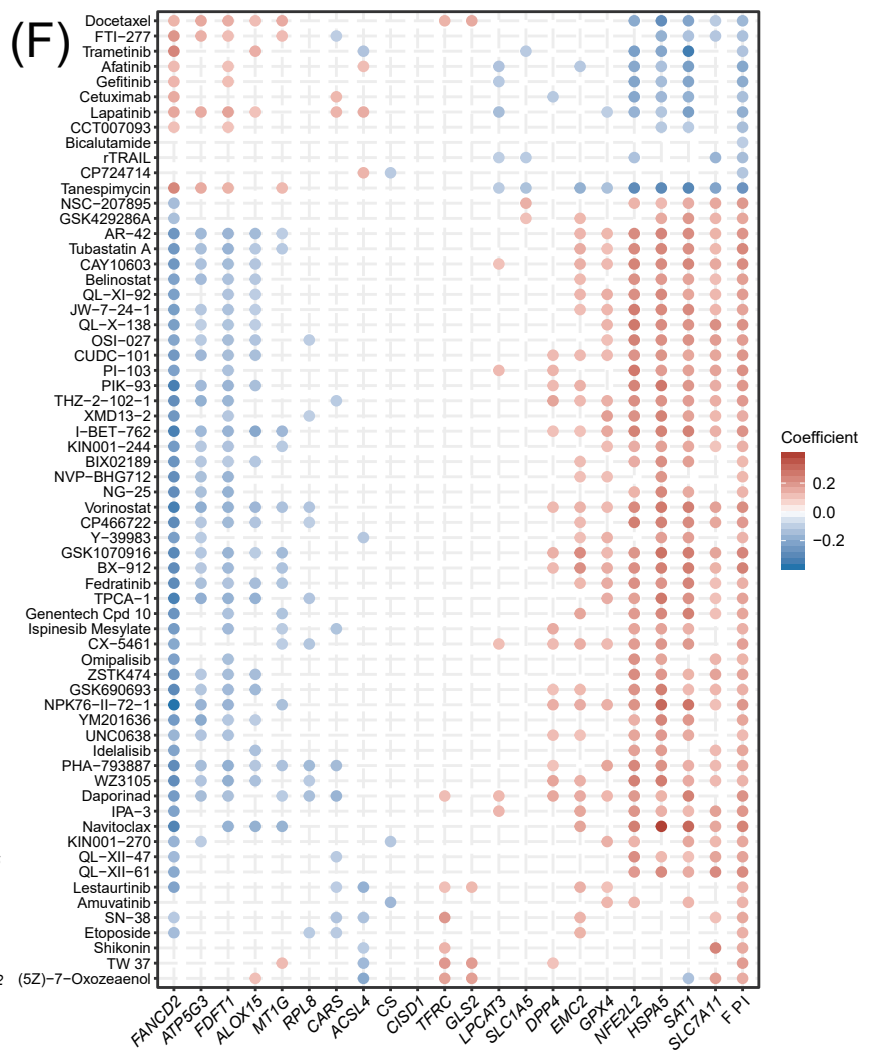

Figure S4. The pharmacogenomic interaction of the FPI and FRGs. Related to Figure 4.

(A) The co-expression of FRGs and 136 drug-targeted genes. (B) The number of CAGs correlated with FRGs. (C) The number of FRG-CAG correlation pairs. (D) The co-expression of FRGs and 20 genes for immunotherapy. (E) The interactions between drugs, drug targets and FRGs. (F) The correlation between the expression of FRGs and the area under the dose-response curve (AUCs) for drugs.

## **Transparent Methods**

### **Datasets and Source**

The mRNA expression data, copy number alteration thresholded data, masked copy number segmentation data, and DNA methylation 450K data of twenty cancers, including bladder urothelial carcinoma (BLCA), breast invasive carcinoma (BRCA), cholangiocarcinoma (CHOL), colon adenocarcinoma (COAD), cervical and endocervical cancers (CESC), esophageal carcinoma (ESCA), glioblastoma multiforme (GBM), head and neck squamous cell carcinoma (HNSC), kidney chromophobe (KICH), kidney renal clear cell carcinoma (KIRC), kidney renal papillary cell carcinoma (KIRP), liver hepatocellular carcinoma (LIHC), lung adenocarcinoma (LUAD), lung squamous cell carcinoma (LUSC), pancreatic adenocarcinoma (PAAD), prostate adenocarcinoma (PRAD), rectum adenocarcinoma (READ), stomach adenocarcinoma (STAD), thyroid carcinoma (THCA), uterine corpus endometrial carcinoma (UCEC), which had both tumors and normal samples were downloaded from Firehose (<http://gdac.broadinstitute.org>). Mutation data, miRNA-seq data, and clinical data were downloaded from the Xena Browser (<https://xenabrowser.net/datapages/>). Additional gene-centric RMA-normalized gene expression profiles and drug response data of over 1000 cancer cell lines were accessed from the Genomics of Drug Sensitivity in Cancer (GDSC) database (<https://www.cancerrxgene.org/downloads>) (Yang et al., 2013). Immune associated data, including immune cell type fractions and immunophenoscore were obtained from TCIA (<https://tcia.at/home>) (Charoentong et al., 2017), dysfunction and exclusion scores of tumor samples were obtained from TIDE (<http://tide.dfci.harvard.edu/>) (Fu et al., 2020; Jiang et al., 2018). Integrated protein-protein interaction data was obtained from the Human Protein Reference Database (<http://www.hprd.org/>) and BioGRID (<https://thebiogrid.org>) (Keshava Prasad et al., 2009; Peri et al., 2003). We obtained clinically actionable genes (CAGs) from a previous study (Van Allen et al., 2014) (<https://software.broadinstitute.org/cancer/cga/target>).

### **Differential expression analysis of mRNA**

To test genes differentially expressed between tumor and normal tissue, gene expression data for 20502 genes across 20 cancer types were downloaded from TCGA at FireBrowse (<http://gdac.broadinstitute.org>, 2016 January). Then, the fold change and adjusted *P*-value were calculated by the edgeR package (Robinson et al., 2010). We defined genes with an adjusted *P*-value



less than 0.05 as the differential expression genes (DEGs).

### **Establishing the Ferroptosis Potential Index Model**

The index to represent the ferroptosis level was established based on the expression data for genes of ferroptosis core machine including positive components of *LPCAT3*, *ACSL4*, *NCOA4*, *ALOX15*, *GPX4*, *SLC3A2*, *SLC7A11*, *NFE2L2*, *NOX1*, *NOX3*, *NOX4*, *NOX5* and negative components of *FDFT1*, *HMGCR*, *COQ10A*, *COQ10B*. The enrichment score (ES) of gene set that positively or negatively regulated ferroptosis was calculated using single sample gene set enrichment analysis (ssGSEA) in the R package 'GSVA' (Hanzelmann et al., 2013), and the normalized differences between the ES of the positive components minus negative components was defined as the ferroptosis potential index (FPI) to computationally dissect the ferroptosis levels/trends of the tissue samples.

### **Somatic Copy-number Alteration (SCNA) and Mutation Analysis**

The heterozygosity and homozygosity of amplification and deletion were included to evaluate the copy-number alteration of each gene, in which over five percent was regarded as high-frequency SCNA. Pearson's correlation between expression values and copy number segment values of each gene was calculated to evaluate the association between SCNA and expression. The R package "DISCOVER" was employed to evaluate mutual exclusivity between FRGs and tumor suppressor genes or oncogenes across tumor samples in each cancer type (Canisius et al., 2016). The mutation and CNA events were integrated, while only homozygous amplification and deletion were included, and only protein-coding mutations were retained. For each cancer type, the genes were considered to be mutually exclusive if they had a *q* value of 0.05.

### **DNA methylation analysis**

The R package "IlluminaHumanMethylation-450kanno.ilmn12.hg19" from Bioconductor was imported to annotate the methylation probe for the promoter of each gene. Differential methylation of each gene in tumor and normal samples was tested by the Wilcoxon signed rank test, and genes that were significantly hypomethylated or hypermethylated were identified using a *P*-value cutoff of 0.05. Pearson's correlation between the transcriptional expression of FRGs and the Beta value of the promoter DNA methylation were calculated and considered significant if the *P*-value < 0.05.

### **miRNA expression analysis**

To investigate the mechanisms of dysregulation for ferroptosis regulator genes in cancer, we searched potential miRNAs which might regulate the FRGs based on miRNA-target intersections in starBase. The Spearman correlation between the expression of miRNA and FRGs was statistically evaluated (adjusted  $P$ -value  $< 0.1$ ,  $\rho < -0.1$ ). Cytoscape software was used to visualize the high-frequency interaction networks among FRGs and miRNA (Shannon et al., 2003).

### **Multivariate Regression Analysis of Gene Expression**

To assess which factors had significant effects on FRG expression, the expression of each FRG was modeled by linear regression as a function of the median miRNA expression, the median Beta value of promoter methylation, and the copy number of the genes.

### **Clinical Features Analysis**

The R package “survival” was used to assess the prognosis potential of the FRGs and ferroptosis potential index among cancers. For survival analysis, the expression threshold was exhaustively tested and the one with most significant  $P$ -value was considered the best cut-off. To test the association between ferroptosis level and clinical features, the Pearson correlation was calculated between FPI and tumor stages, age, body mass index (BMI) and cigarette exposure per day, which were converted to numeric variables (“stage1” = 1, “stage2” = 2, etc.). Wilcoxon rank sum tests and Tukey’s tests were used to determine the impact on the ferroptosis potential index for other clinical characteristics including race, remission status, and alcohol. The influence of different MSI statuses(Liu et al., 2018), histologic types, and molecular subtypes on FPI were also considered(Ciriello et al., 2015).

### **Immune Features Analysis**

To study the relationship of ferroptosis and immune microenvironments, we computed the Pearson correlation between FPI and immune parameters including immune cell fractions and 5 types of immunophenoscores.

### **Identifying the FPI associated significant driver gene mutation**

A total of 375 driver genes identified in previous pan-cancer research were included for analysis (Lawrence et al., 2013). To test whether a driver gene's mutational status was significantly associated with ferroptosis among cancers, the rank-transformed FPI was modeled by linear regression as a function of the driver gene's mutational status, ignoring the synonymous variant. To diminish the confounding effects, the rank-transformed count of the total nonsynonymous mutations and the tumor type, which were encoded as virtual variables, were included. To further characterize each cancer, the Benjamini-Hochberg method was used to correct the  $P$  values across 375 genes. Genes with an adjusted  $P$  value less than 0.05 for mutation status variable were significantly associated with FPI.

### **Gene Set Enrichment Analysis**

To identify the pathways associated with ferroptosis, the samples of each tumor type were divided into two groups according to the FPI, consisting of the top 30% and bottom 30%. Then, the gene set enrichment analysis (GSEA) was performed (Subramanian et al., 2005).

### **Correlation between Drug Sensitivity and FPI/FRG Expression**

To test the correlation between small molecular drugs and FPI and FRGs, the Pearson correlation coefficients for FPI, the expression value of FRGs and the area under the dose-response curve (AUCs) values were calculated, the results with  $|R| > 0.1$  and  $P$ -value  $< 0.05$  were considered as significantly correlated. To further investigate the influence of drugs on ferroptosis, the significant association between the expression of clinically actionable genes and FRGs were finished across cancer cell lines, and the associations were filtered with PPIs. Then the drugs which target CAGs were selected according to DrugBank (Wishart et al., 2018) (<https://www.drugbank.ca>).

### **Supplemental References**

Canisius, S., Martens, J.W., and Wessels, L.F. (2016). A novel independence test for somatic alterations in cancer shows that biology drives mutual exclusivity but chance explains most co-occurrence. *Genome Biol* *17*, 261.

Charoentong, P., Finotello, F., Angelova, M., Mayer, C., Efremova, M., Rieder, D., Hackl, H., and Trajanoski, Z. (2017). Pan-cancer Immunogenomic Analyses Reveal Genotype-Immunophenotype Relationships and Predictors of Response to Checkpoint Blockade. *Cell Rep* *18*, 248-262.

Ciriello, G., Gatz, M.L., Beck, A.H., Wilkerson, M.D., Rhie, S.K., Pastore, A., Zhang, H., McLellan, M., Yau, C., Kandoth, C., *et al.* (2015). Comprehensive Molecular Portraits of Invasive Lobular Breast Cancer. *Cell* *163*, 506-519.

Fu, J., Li, K., Zhang, W., Wan, C., Zhang, J., Jiang, P., and Liu, X.S. (2020). Large-scale public data reuse to model immunotherapy response and resistance. *Genome Med* *12*, 21.

Hanzelmann, S., Castelo, R., and Guinney, J. (2013). GSEA: gene set variation analysis for microarray and RNA-seq data. *BMC Bioinformatics* *14*, 7.

Jiang, P., Gu, S., Pan, D., Fu, J., Sahu, A., Hu, X., Li, Z., Traugh, N., Bu, X., Li, B., *et al.* (2018). Signatures of T cell dysfunction and exclusion predict cancer immunotherapy response. *Nat Med* *24*, 1550-1558.

Keshava Prasad, T.S., Goel, R., Kandasamy, K., Keerthikumar, S., Kumar, S., Mathivanan, S., Telikicherla, D., Raju, R., Shafreen, B., Venugopal, A., *et al.* (2009). Human Protein Reference Database--2009 update. *Nucleic Acids Res* *37*, D767-772.

Lawrence, M.S., Stojanov, P., Polak, P., Kryukov, G.V., Cibulskis, K., Sivachenko, A., Carter, S.L., Stewart, C., Mermel, C.H., Roberts, S.A., *et al.* (2013). Mutational heterogeneity in cancer and the search for new cancer-associated genes. *Nature* *499*, 214-218.

Liu, Y., Sethi, N.S., Hinoue, T., Schneider, B.G., Cherniack, A.D., Sanchez-Vega, F., Seoane, J.A., Farshidfar, F., Bowlby, R., Islam, M., *et al.* (2018). Comparative Molecular Analysis of Gastrointestinal Adenocarcinomas. *Cancer Cell* *33*, 721-735 e728.

Peri, S., Navarro, J.D., Amanchy, R., Kristiansen, T.Z., Jonnalagadda, C.K., Surendranath, V., Niranjana, V., Muthusamy, B., Gandhi, T.K., Gronborg, M., *et al.* (2003). Development of human protein reference database as an initial platform for approaching systems biology in humans. *Genome Res* *13*, 2363-2371.

Robinson, M.D., McCarthy, D.J., and Smyth, G.K. (2010). edgeR: a Bioconductor package for differential expression analysis of digital gene expression data. *Bioinformatics* *26*, 139-140.

Shannon, P., Markiel, A., Ozier, O., Baliga, N.S., Wang, J.T., Ramage, D., Amin, N., Schwikowski, B., and Ideker, T. (2003). Cytoscape: a software environment for integrated models of biomolecular interaction networks. *Genome Res* *13*, 2498-2504.

Subramanian, A., Tamayo, P., Mootha, V.K., Mukherjee, S., Ebert, B.L., Gillette, M.A., Paulovich, A., Pomeroy, S.L., Golub, T.R., Lander, E.S., *et al.* (2005). Gene set enrichment analysis: a knowledge-based approach for interpreting genome-wide expression profiles. *Proc Natl Acad Sci U S A* *102*, 15545-15550.

Van Allen, E.M., Wagle, N., Stojanov, P., Perrin, D.L., Cibulskis, K., Marlow, S., Jane-Valbuena, J., Friedrich, D.C., Kryukov, G., Carter, S.L., *et al.* (2014). Whole-exome sequencing and clinical interpretation of formalin-fixed, paraffin-embedded tumor samples to guide precision cancer medicine. *Nat Med* *20*, 682-688.

Wishart, D.S., Feunang, Y.D., Guo, A.C., Lo, E.J., Marcu, A., Grant, J.R., Sajed, T., Johnson, D., Li, C., Sayeeda, Z., *et al.* (2018). DrugBank 5.0: a major update to the DrugBank database for 2018. *Nucleic Acids Res* *46*, D1074-D1082.

Yang, W., Soares, J., Greninger, P., Edelman, E.J., Lightfoot, H., Forbes, S., Bindal, N., Beare, D., Smith, J.A., Thompson, I.R., *et al.* (2013). Genomics of Drug Sensitivity in Cancer (GDSC): a resource for therapeutic biomarker discovery in cancer cells. *Nucleic Acids Res* *41*, D955-961.
